# Supplementary material for: Identifying knowledge gaps in hypersaline systems supporting the global electrical transition: invertebrate community structure in salars from the lithium triangle
Source: PeerJ. 2025 Oct 13;13:e20042. doi: 10.7717/peerj.20042 (PMC12530211; doi:10.7717/peerj.20042)
Supplement: Supplemental Information 1 [file peerj-13-20042-s001.xlsx]

## Sheet: Data
System name	Country	Altitude	Area of lake (km2)	Salinity min (g/L)	Salinity max (g/L)	Reference	Latitude	Longitude	Cluster	Cochliopidae	Planorbidae	Physidae	Sphaeriidae	Coenagrionidae	Aeshnidae	Hydroptilidae	Corixidae	Chironomidae	Ceratopogonidae	Ephydridae	Dytiscidae	Elmidae	Hyalellidae	Cladocera	Daphnidae	Chydoridae	Macrothricidae	Centropagidae	Cyclopidae	Canthocamptidae	Ostracoda	Cyprididae	Limnocytheridae	Artemiidae	Branchinectidae	Hydrachnidiae	Limnocharidae	Hydrozetidae	Rotifera	Trichotriidae	Euchlanidae	Lecanidae	Naididae	Tubificidae sp.	Enchytraeidae	Glossiphoniidae sp	Dugesiidae	Nematoda	Achromadoridae
Salar Pastos grandes (Bolivia)	Bolivia	4440	125	NA	5.7	Williams et al 1995	-21.64	-67.8	h	0	0	0	0	0	0	0	1	1	0	1	0	0	0	0	0	0	0	0	1	1	1	0	0	0	0	0	0	0	0	0	0	0	0	0	0	0	0	0	0
Laguna Ramaditas	Bolivia	4117	4	33	47.3	Hulbert et al 1984; Dejoux 1993; Williams et al 1995	-21.63	-68.08	f	0	0	0	0	0	0	0	0	1	0	0	0	0	1	0	0	0	0	1	0	1	0	0	0	0	0	0	0	0	0	0	0	0	0	0	0	0	0	1	0
Laguna Hedionda	Bolivia	4121	4.4	9.8	60	Dejoux 1993; Williams et al 1995	-21.57	-68.05	e	0	0	0	0	0	0	0	1	1	0	1	0	1	1	0	0	0	0	0	0	0	0	0	0	1	0	0	0	0	0	0	0	0	1	0	0	1	0	0	0
Laguna Cañapa	Bolivia	4140	1.5	8.5	85.8	Dejoux 1993; Williams et al 1995	-21.51	-68.01	h	0	0	0	0	0	0	0	0	1	1	1	0	1	0	0	0	0	0	0	0	0	0	0	0	1	0	0	0	0	0	0	0	0	0	0	0	0	0	0	0
Laguna Colorada	Bolivia	4278	52	NA	156.4	Williams et al 1995	-22.2	-67.78	c	0	0	0	0	0	0	0	0	0	0	1	0	0	0	0	0	0	0	0	0	0	0	0	0	1	0	0	0	0	0	0	0	0	0	0	0	0	0	0	0
Laguna Chiar Khota	Bolivia	4110	2.1	NA	120	Dejoux 1993	-21.58	-68.07	c	0	0	0	0	0	0	0	0	0	0	0	0	0	0	0	0	0	0	0	0	0	0	0	0	1	0	0	0	0	0	0	0	0	0	0	0	0	0	0	0
Laguna Honda	Bolivia	4110	0.3	NA	35	Dejoux 1993	-21.62	-68.07	g	0	0	0	0	0	0	0	0	1	0	0	0	0	0	0	0	0	0	0	0	0	0	0	0	0	0	0	0	0	0	0	0	0	0	0	0	0	0	0	0
Laguna Pujio	Bolivia	4110	0.07	NA	45	Dejoux 1993	-21.62	-68.07	g	0	0	0	0	0	0	0	0	1	0	0	0	0	0	0	0	0	0	0	0	0	0	0	0	0	0	0	0	0	0	0	0	0	0	0	0	0	0	0	0
Laguna Ballivian	Bolivia	4130	0.02	NA	36	Dejoux 1993	-21.63	-68.08	g	0	0	0	0	0	0	0	0	1	0	0	0	1	0	0	0	0	0	0	0	0	0	0	0	0	0	0	0	0	0	0	0	0	0	0	0	0	0	0	0
Laguna Caliente	Bolivia	4440	0.34	5	38	Dejoux 1993	-21.64	-67.8	e	1	0	0	0	0	0	0	1	1	1	1	0	1	1	0	0	0	0	0	0	0	0	0	0	0	0	0	0	0	0	0	0	0	1	0	0	0	0	0	0
Laguna Cachi	Bolivia	4495	1.1	NA	12.4	Dejoux 1993	-21.72	-67.95	e	0	0	0	0	0	0	0	0	0	0	1	0	1	1	0	0	0	0	0	0	0	0	0	0	0	0	0	0	0	0	0	0	0	0	0	0	0	0	0	0
Polques	Bolivia	4394	13.4	4.9	15	Bayly 1993; Dejoux 1993	-22.53	-67.62	e	0	1	0	0	0	0	0	1	1	1	1	1	1	1	0	0	0	0	1	0	0	0	0	0	0	0	1	0	1	0	0	0	0	1	0	0	0	1	0	0
Laguna Verde	Bolivia	4310	16	20.2	58.1	Dejoux 1993; Bayly 1993	-22.8	-67.8	e	1	0	0	0	0	0	0	0	1	0	0	0	1	1	0	0	0	0	1	0	0	0	0	0	0	0	0	0	0	0	0	0	0	1	0	0	1	0	0	0
Aguas calientes I	Chile	4280	2.5	1.359	122.89	Bayly 1993; Risacher et al 1999	-23.13	-67.4	b	0	0	0	0	0	0	0	0	0	0	0	0	0	0	0	0	0	0	1	0	0	0	0	0	0	0	0	0	0	0	0	0	0	0	0	0	0	0	0	0
Aguas calientes II	Chile	4200	9	2.53	13.656	Bayly 1993; Risacher et al 1999	-23.52	-67.57	b	0	0	0	0	0	0	0	0	0	0	0	0	0	0	0	0	0	0	1	0	0	0	0	0	0	0	0	0	0	0	0	0	0	0	0	0	0	0	0	0
Aguas calientes III	Chile	3950	2.5	2.491	25.15	Bayly 1993; Risacher et al 1999	-25	-68.63	b	0	0	0	0	0	0	0	0	0	0	0	0	0	0	0	0	0	0	1	0	0	0	0	0	0	0	0	0	0	0	0	0	0	0	0	0	0	0	0	0
Hombre muerto	Argentina	3973	13	NA	21	Bayly 1993	-25.5	-66.85	b	0	0	0	0	0	0	0	0	0	0	0	0	0	0	0	0	0	0	1	0	0	0	0	0	0	0	0	0	0	0	0	0	0	0	0	0	0	0	0	0
Guacha	Bolivia	NA	NA	NA	36	Bayly 1993	-22.55	-67.52	b	0	0	0	0	0	0	0	0	0	0	0	0	0	0	0	0	0	0	1	0	0	0	0	0	0	0	0	0	0	0	0	0	0	0	0	0	0	0	0	0
Collpacocha	Peru	3825	1.4	NA	38.6	Hulbert et al 1986; Bayly 1993	-15.25	-70.05	a	0	0	0	0	0	0	0	0	0	0	0	0	0	0	0	0	0	0	1	1	0	0	0	0	0	0	0	0	0	0	0	0	0	0	0	0	0	0	0	0
Este	Bolivia	NA	NA	NA	86	Bayly 1993	-22.52	-67.48	b	0	0	0	0	0	0	0	0	0	0	0	0	0	0	0	0	0	0	1	0	0	0	0	0	0	0	0	0	0	0	0	0	0	0	0	0	0	0	0	0
Chojllas	Bolivia	4545	5.5	NA	11.1	Bayly 1993	-22.37	-67.1	b	0	0	0	0	0	0	0	0	0	0	0	0	0	0	0	0	0	0	1	0	0	0	0	0	0	0	0	0	0	0	0	0	0	0	0	0	0	0	0	0
Soledad	Bolivia	NA	NA	NA	11	Bayly 1993	-17.73	-67.37	b	0	0	0	0	0	0	0	0	0	0	0	0	0	0	0	0	0	0	1	0	0	0	0	0	0	0	0	0	0	0	0	0	0	0	0	0	0	0	0	0
Loriscota	Peru	4562	33	NA	10.4	Hulbert et al 1986; Bayly 1993	-16.87	-70.03	b	0	0	0	0	0	0	0	0	0	0	0	0	0	0	0	0	0	0	1	0	0	0	0	0	0	0	0	0	0	1	0	0	0	0	0	0	0	0	0	0
Khara	Bolivia	4509	13	NA	8.7	Bayly 1993	-21.9	-67.87	b	0	0	0	0	0	0	0	0	0	0	0	0	0	0	0	0	0	0	1	0	0	0	0	0	0	0	0	0	0	0	0	0	0	0	0	0	0	0	0	0
Puripica chico	Bolivia	4393	0.7	NA	8.2	Bayly 1993	-22.52	-67.5	b	0	0	0	0	0	0	0	0	0	0	0	0	0	0	0	0	0	0	1	0	0	0	0	0	0	0	0	0	0	0	0	0	0	0	0	0	0	0	0	0
Catalcito	Bolivia	4545	2.1	NA	8.1	Bayly 1993	-23.52	-67.25	b	0	0	0	0	0	0	0	0	0	0	0	0	0	0	0	1	0	0	1	0	0	0	0	0	0	0	0	0	0	0	0	0	0	0	0	0	0	0	0	0
Pozuelos	Bolivia	NA	NA	NA	6.2	Bayly 1993	-22.33	-66	b	0	0	0	0	0	0	0	0	0	0	0	0	0	0	0	0	0	0	1	0	0	0	0	0	0	0	0	0	0	0	0	0	0	0	0	0	0	0	0	0
Parinacochas	Peru	3273	67	NA	5.6	Hulbert et al 1986; Bayly 1993	-15.28	-73.7	a	0	0	0	0	0	0	0	0	0	0	0	0	0	0	0	1	0	0	1	1	0	0	0	0	0	0	0	0	0	0	0	0	0	0	0	0	0	0	0	0
Pelada	Bolivia	4590	1.9	NA	4.1	Bayly 1993	-22.75	-67.17	b	0	0	0	0	0	0	0	0	0	0	0	0	0	0	0	1	0	0	1	0	0	0	0	0	0	0	0	0	0	0	0	0	0	0	0	0	0	0	0	0
Penitas blancas	Bolivia	NA	NA	NA	3.7	Bayly 1993	-22.43	-67.37	b	0	0	0	0	0	0	0	0	0	0	0	0	0	0	0	0	0	0	1	0	0	0	0	0	0	0	0	0	0	0	0	0	0	0	0	0	0	0	0	0
Huancaroma	Bolivia	NA	NA	NA	3.5	Bayly 1993	-17.67	-67.5	b	0	0	0	0	0	0	0	0	0	0	0	0	0	0	0	0	0	0	1	0	0	0	0	0	0	0	0	0	0	0	0	0	0	0	0	0	0	0	0	0
Campo Grande	Bolivia	NA	NA	NA	3.4	Bayly 1993	-22.55	-67.2	b	0	0	0	0	0	0	0	0	0	0	0	0	0	0	0	0	0	0	1	0	0	0	0	0	0	0	0	0	0	0	0	0	0	0	0	0	0	0	0	0
Pampamarca	Peru	3788	6.7	NA	0.8	Bayly 1993	-14.13	-71.48	b	0	0	0	0	0	0	0	0	0	0	0	0	0	0	0	0	0	0	1	0	0	0	0	0	0	0	0	0	0	0	0	0	0	0	0	0	0	0	0	0
Viscacha	Peru	4575	8.4	NA	0.9	Hulbert et al 1986; Bayly 1993	-16.88	-70.23	b	0	0	0	0	0	0	0	0	0	0	0	0	0	0	0	0	0	0	1	0	0	0	0	0	0	0	0	0	0	0	0	0	0	0	0	0	0	0	0	0
Conchostraca	Bolivia	NA	NA	NA	0.69	Bayly 1993	-22.3	-67.23	b	0	0	0	0	0	0	0	0	0	0	0	0	0	0	0	0	0	0	1	0	0	0	0	0	0	0	0	0	0	0	0	0	0	0	0	0	0	0	0	0
Totoral	Bolivia	4559	1	NA	0.65	Bayly 1993	-22.53	-67.23	b	0	0	0	0	0	0	0	0	0	0	0	0	0	0	0	0	0	0	1	0	0	0	0	0	0	0	0	0	0	0	0	0	0	0	0	0	0	0	0	0
Loripongo	Peru	4555	0.6	0.46	0.62	Hulbert et al 1986; Bayly 1993	-16.83	-70.08	b	0	0	0	0	0	0	0	0	0	0	0	0	0	0	1	0	0	0	1	0	0	0	0	0	0	0	0	0	0	0	0	0	0	0	0	0	0	0	0	0
Llamara	Chile	754	0.020776	NA	160	Zuñiga et al 1999; De Los Rios 2005	-21.3	-69.62	c	0	0	0	0	0	0	0	0	0	0	0	0	0	0	0	0	0	0	0	0	0	0	0	0	1	0	0	0	0	0	0	0	0	0	0	0	0	0	0	0
Cejas I	Chile	2343	0.025288	NA	129.3	Zuñiga et al 1994; Zuñiga et al 1999; De Los Rios 2005	-23.03	-68.22	c	0	0	0	0	0	0	0	0	0	0	0	0	0	0	0	0	0	0	0	0	0	0	0	0	1	0	0	0	0	0	0	0	0	0	0	0	0	0	0	0
Cejas II	Chile	2343	0.018989	NA	150	De los Ríos-Escalante & Amarouayache, 2016	-23.03	-68.22	c	0	0	0	0	0	0	0	0	0	0	0	0	0	0	0	0	0	0	0	0	0	0	0	0	1	0	0	0	0	0	0	0	0	0	0	0	0	0	0	0
Cejas III	Chile	2343	0.069205	NA	189	De los Ríos-Escalante & Amarouayache, 2016	-23.03	-68.22	c	0	0	0	0	0	0	0	0	0	0	0	0	0	0	0	0	0	0	0	0	0	0	0	0	1	0	0	0	0	0	0	0	0	0	0	0	0	0	0	0
Tebenquiche	Chile	2317	2	NA	300	Zuñiga et al 1991; Zuñiga et al 1999; De Los Rios 2005	-23.12	-68.27	c	0	0	0	0	0	0	0	0	0	0	0	0	0	0	0	0	0	0	0	0	1	0	0	0	1	0	0	0	0	0	0	0	0	0	0	0	0	0	0	0
Chaxas	Chile	2302	0.2	NA	120	De Los Rios 2005	-23.29	-68.18	c	0	0	0	0	0	0	0	0	0	0	0	0	0	0	0	0	0	0	0	0	0	0	0	0	1	0	0	0	0	0	0	0	0	0	0	0	0	0	0	0
Gemela Este	Chile	2400	1	NA	41	De Los Rios & Crespo 2004; De Los Rios 2005	-23.23	-68.23	b	0	0	0	0	0	0	0	0	0	0	0	0	0	0	0	0	0	0	1	0	0	0	0	0	0	0	0	0	0	0	0	0	0	0	0	0	0	0	0	0
Gemela Oeste	Chile	2400	1	NA	51	De Los Rios & Crespo 2004; De Los Rios 2005	-23.23	-68.23	b	0	0	0	0	0	0	0	0	0	0	0	0	0	0	0	0	0	0	1	0	0	0	0	0	0	0	0	0	0	0	0	0	0	0	0	0	0	0	0	0
Miscanti	Chile	4120	13.4	NA	8.98	De Los Rios & Crespo 2004; De Los Rios 2005	-23.72	-67.8	a	0	0	0	0	0	0	0	0	0	0	0	0	0	0	0	1	1	0	1	1	0	0	0	0	0	0	0	0	0	0	0	0	0	0	0	0	0	0	0	0
Miñiques	Chile	4120	1.6	NA	9.79	De Los Rios & Crespo 2004; De Los Rios 2005	-23.72	-67.8	a	0	0	0	0	0	0	0	0	0	0	0	0	0	0	0	1	1	0	1	1	0	0	0	0	0	0	0	0	0	0	0	0	0	0	0	0	0	0	0	0
Capur	Chile	3950	0.9	NA	3.4	De Los Rios & Crespo 2004; De Los Rios 2005	-23.9	-67.8	a	0	0	0	0	0	0	0	0	0	0	0	0	0	0	0	0	1	0	1	1	0	0	0	0	0	0	0	0	0	0	0	0	0	0	0	0	0	0	0	0
Santa Rosa	Chile	3766	0.64	NA	8	Bayly 1993;De Los Rios & Crespo 2004; De Los Rios 2005	-27.08	-69.17	b	0	0	0	0	0	0	0	0	0	0	0	0	0	0	0	0	1	0	1	0	0	0	0	0	0	0	0	0	0	0	0	0	0	0	0	0	0	0	0	0
Tilopozo	Chile	2314	ND	2.5	3	Zuñiga et al, 1991; Collado et al, 2013	-23.78	-68.24	d	1	0	0	0	0	0	0	0	0	0	0	0	0	0	0	0	0	0	0	1	1	0	0	0	0	0	0	0	0	1	0	1	1	0	0	0	0	0	0	0
Puilar	Chile	2306	0.12	14.32	16.98	Dorador et al 2018; Salazar com. pers	-23.31	-68.15	e	1	0	0	0	0	0	0	0	0	0	1	0	0	1	0	0	0	0	0	0	0	0	0	0	0	0	0	0	0	0	0	0	0	0	0	0	0	0	0	0
Tara	Chile	4322	14	0.42	70	Garcia-Sanz et al 2021; Salazar com. pers	-23.02	-67.3	f	0	0	0	0	0	0	0	1	1	0	0	0	1	1	0	0	1	0	1	1	1	0	1	1	0	0	0	0	1	0	0	0	0	0	0	0	1	0	0	0
Ascotan	Chile	3716	18	0.089	119.853	Collado & Mendez 2012; Sobarzo-Opazo 2014; Lagomarsino 2015	-21.49	-68.26	f	1	1	1	1	1	1	1	0	1	0	0	1	1	1	0	1	1	0	1	1	1	1	0	0	0	0	0	1	1	0	1	1	0	0	0	0	0	0	0	0
Carcote	Chile	3690	3.5	0.089	335.536	Collado & Mendez 2013; Carcamo 2017	-21.27	-68.32	f	1	1	0	0	0	0	0	0	0	0	0	0	1	1	0	0	1	0	0	1	0	1	0	0	0	0	0	0	1	0	0	1	0	1	0	0	0	1	0	0
Laguna Verde (Argentina)	Argentina	3334	0.010132	NA	176.26	Colla et al 2022	-25.48	-67.55	h	0	0	0	0	0	0	0	0	1	0	1	0	0	0	0	0	0	0	0	0	0	0	0	0	1	0	0	0	0	1	0	0	0	0	0	0	0	0	0	0
Pozo Bravo	Argentina	3327	0.021108	NA	140.69	Colla et al 2022	-25.52	-67.58	h	0	0	0	0	0	0	0	0	1	0	1	0	0	0	0	0	0	0	0	0	1	0	0	0	1	0	0	0	0	0	0	0	0	0	0	0	0	0	0	0
Ojo de campo azul	Argentina	3331	0.001813	NA	27.9	Colla et al 2022	-25.61	-67.67	h	0	0	0	0	0	0	0	0	1	1	1	0	0	0	0	0	0	0	1	0	1	1	0	0	0	0	1	0	0	0	0	0	0	0	0	1	0	0	0	1
Ojo de campo naranja	Argentina	3332	0.0008349	NA	149.6	Colla et al 2022	-25.61	-67.67	c	0	0	0	0	0	0	0	0	0	0	1	0	0	0	0	0	0	0	0	0	0	0	0	0	1	0	0	0	0	0	0	0	0	0	0	0	0	0	0	0
Salar de Surire	Chile	4260	9.5	0.108	102	Zuñiga et al 1999; Scheihing et al 2010	-18.84	-69.05	f	0	0	0	0	0	0	0	0	1	0	0	0	0	1	0	0	1	1	1	1	1	0	0	1	0	0	0	0	0	0	0	0	0	1	1	0	1	0	0	0
Lago salinas	Peru	3840	9.7	NA	251	Hulbert et al 1986	-14.98	-70.12	c	0	0	0	0	0	0	0	0	0	0	0	0	0	0	0	0	0	0	0	0	0	0	0	0	1	0	0	0	0	0	0	0	0	0	0	0	0	0	0	0
Saytococha	Peru	4225	1	NA	0.12	Hulbert et al 1986	-15.9	-70.53	a	0	0	0	0	0	0	0	0	0	0	0	0	0	0	0	1	1	0	1	1	0	0	0	0	0	0	0	0	0	1	0	0	0	0	0	0	0	0	0	0
Laguna las salinas	Peru	4295	24	NA	8.5	Hulbert et al 1986	-16.37	-71.15	c	0	0	0	0	0	0	0	0	0	0	0	0	0	0	0	0	0	0	0	0	0	0	0	0	1	0	0	0	0	1	0	0	0	0	0	0	0	0	0	0
Laguna Chulluncani	Bolivia	4450	0.8	19	69	Hulbert et al 1984	-21.55	-67.88	b	0	0	0	0	0	0	0	0	0	0	0	0	0	0	0	0	0	0	1	0	0	0	0	0	0	1	0	0	0	0	0	0	0	0	0	0	0	0	0	0
[truncated: 6 more columns]

## Sheet: readme
Column	Description
System name	Ecosystem name
Country	Country
Altitude	Altitude above sea level (m)
Area of lake (km2)	Area of open water/salar (km2)
Salinity min (g/L)	Minimum reported salinity (g/L)
Salinity max (g/L)	Maximum recorded salinity (g/L)
Reference	Data source
Latitude	Location of ecosystem (decimal degrees latitude)
Longitude	Location of ecosystem (decimal degrees longitude)
Cluster	Cluster name - see article
Cochliopidae	Presence (1) or abscence (0) of the taxon Cochliopidae
Planorbidae	Presence (1) or abscence (0) of the taxon Planorbidae
Physidae	Presence (1) or abscence (0) of the taxon Physidae
Sphaeriidae	Presence (1) or abscence (0) of the taxon Sphaeriidae
Coenagrionidae	Presence (1) or abscence (0) of the taxon Coenagrionidae
Aeshnidae	Presence (1) or abscence (0) of the taxon Aeshnidae
Hydroptilidae	Presence (1) or abscence (0) of the taxon Hydroptilidae
Corixidae	Presence (1) or abscence (0) of the taxon Corixidae
Chironomidae	Presence (1) or abscence (0) of the taxon Chironomidae
Ceratopogonidae	Presence (1) or abscence (0) of the taxon Ceratopogonidae
Ephydridae	Presence (1) or abscence (0) of the taxon Ephydridae
Dytiscidae	Presence (1) or abscence (0) of the taxon Dytiscidae
Elmidae	Presence (1) or abscence (0) of the taxon Elmidae
Hyalellidae	Presence (1) or abscence (0) of the taxon Hyalellidae
Cladocera	Presence (1) or abscence (0) of the taxon Cladocera
Daphnidae	Presence (1) or abscence (0) of the taxon Daphnidae
Chydoridae	Presence (1) or abscence (0) of the taxon Chydoridae
Macrothricidae	Presence (1) or abscence (0) of the taxon Macrothricidae
Centropagidae	Presence (1) or abscence (0) of the taxon Centropagidae
Cyclopidae	Presence (1) or abscence (0) of the taxon Cyclopidae
Canthocamptidae	Presence (1) or abscence (0) of the taxon Canthocamptidae
Ostracoda	Presence (1) or abscence (0) of the taxon Ostracoda
Cyprididae	Presence (1) or abscence (0) of the taxon Cyprididae
Limnocytheridae	Presence (1) or abscence (0) of the taxon Limnocytheridae
Artemiidae	Presence (1) or abscence (0) of the taxon Artemiidae
Branchinectidae	Presence (1) or abscence (0) of the taxon Branchinectidae
Hydrachnidiae	Presence (1) or abscence (0) of the taxon Hydrachnidiae
Limnocharidae	Presence (1) or abscence (0) of the taxon Limnocharidae
Hydrozetidae	Presence (1) or abscence (0) of the taxon Hydrozetidae
Rotifera	Presence (1) or abscence (0) of the taxon Rotifera
Trichotriidae	Presence (1) or abscence (0) of the taxon Trichotriidae
Euchlanidae	Presence (1) or abscence (0) of the taxon Euchlanidae
Lecanidae	Presence (1) or abscence (0) of the taxon Lecanidae
Naididae	Presence (1) or abscence (0) of the taxon Naididae
Tubificidae sp.	Presence (1) or abscence (0) of the taxon Tubificidae sp.
Enchytraeidae	Presence (1) or abscence (0) of the taxon Enchytraeidae
Glossiphoniidae sp	Presence (1) or abscence (0) of the taxon Glossiphoniidae sp
Dugesiidae	Presence (1) or abscence (0) of the taxon Dugesiidae
Nematoda	Presence (1) or abscence (0) of the taxon Nematoda
Achromadoridae	Presence (1) or abscence (0) of the taxon Achromadoridae
Oncholaimidae	Presence (1) or abscence (0) of the taxon Oncholaimidae
Monhysteridae	Presence (1) or abscence (0) of the taxon Monhysteridae
Xyalidae	Presence (1) or abscence (0) of the taxon Xyalidae
Plectidae	Presence (1) or abscence (0) of the taxon Plectidae
Tobrilidae	Presence (1) or abscence (0) of the taxon Tobrilidae
Dorylaimidae	Presence (1) or abscence (0) of the taxon Dorylaimidae
